# Supplementary material for: Label-Free Multiplexed Microfluidic Analysis of Protein Interactions Based on Photonic Crystal Surface Mode Imaging
Source: MDPI journal article supplement (doi:10.3390/ijms24054347), 2023-02-22
Supplement: s1 [file s1]

**Table S1.** Proteins and peptides used for engineering of a label-free photonic crystal mode imaging chip for multiplexed microfluidic analysis of protein interactions.

| Sample              | Description                                                                                                                                                                                                                                                      | Sample concentration before spotting, µg/mL | Approximate quantity of protein/peptide spotted (0.4 nL/drop), drop number: protein quantity |
|---------------------|------------------------------------------------------------------------------------------------------------------------------------------------------------------------------------------------------------------------------------------------------------------|---------------------------------------------|----------------------------------------------------------------------------------------------|
| Secondary Ab-IRD800 | Secondary anti-rabbit antibody conjugated with IRDye 800CW<br>0.5 mg/mL solution in phosphate-buffered saline (pH 7.4) containing 10 mg/mL BSA and 0.01% sodium azide.<br>Dilution, 1 : 2.                                                                       | 250                                         | 1 : 0.1ng<br>2 : 0.2 ng<br>5 : 0.5 ng<br>10 : 1.0 ng                                         |
| Secondary Ab-AF680  | Highly cross-adsorbed secondary anti-mouse immunoglobulin G (H+L) antibody produced in goat and conjugated with Alexa Fluor 680<br>2 mg/mL solution in 0.1 M phosphate-buffered saline (pH 7.5) containing 0.1 M NaCl and 5 mM sodium azide.<br>Dilution, 1 : 2. | 1000                                        | 1 : 0.4 ng<br>2 : 0.8 ng<br>5 : 2.0 ng<br>10 : 4.0 ng                                        |
| Protein A           | Pierce™ immunoglobulin G-binding protein A<br>5 mg/mL solution in phosphate-buffered saline.<br>Undiluted.                                                                                                                                                       | 5000                                        | 1 : 2.0 ng<br>2 : 4.0 ng<br>5 : 10.0 ng<br>10 : 20.0 ng                                      |
| Protein G           | Pierce™ immunoglobulin G-binding recombinant protein G<br>5 mg/mL in phosphate-buffered saline.<br>Dilution, 1 : 4.                                                                                                                                              | 1250                                        | 1 : 0.5 ng<br>2 : 1.0 ng<br>5 : 2.5 ng<br>10 : 5.0 ng                                        |
| RAD51               | DNA repair protein,<br>1.3 mg/mL solution in a buffer containing 50 mM Tris HCl (pH 7.5), 10% glycerol, 500 mM NaCl, 1 mM EDTA, 1 mM DTT.<br>Undiluted.                                                                                                          | 1300                                        | 1 : 0.5 ng<br>2 : 1.0 ng<br>5 : 2.6 ng<br>10 : 5.2 ng                                        |
| pY315               | KIY(P)DSPCLPEAEAMFY sequence of RAD51 peptide fragment, 1 mg/mL solution in ultrapure water.<br>Undiluted.                                                                                                                                                       | 1000                                        | 5 : 2.0 ng<br>10 : 4.0 ng                                                                    |
| Y315                | KIYDSPCLPEAEAMFY sequence of RAD51 peptide fragment,<br>1 mg/mL solution in ultrapure water.<br>Undiluted                                                                                                                                                        | 1000                                        | 1 : 0.4 ng<br>2 : 0.8 ng                                                                     |
| BSA                 | Pierce™ Bovine Serum Albumin Standard<br>2 mg/mL solution in ultrapure 0.9% saline with 0.05% sodium azide.<br>Undiluted.                                                                                                                                        | 2000                                        | 1 : 0.8 ng<br>2 : 1.6 ng<br>5 : 4.0 ng<br>10 : 8.0 ng                                        |
| Phosphotyrosine-BSA | Bovine serum albumin phosphorylated at tyrosine residues<br>2 mg/mL solution in 0.01 M phosphate-buffered saline (pH 7.4) containing 15 mM sodium azide.<br>Undiluted.                                                                                           | 2000                                        | 1 : 0.8 ng<br>2 : 1.6 ng<br>5 : 4.0 ng<br>10 : 8.0 ng                                        |

|                         |                                                                                                                                                                                                                                                         |     |                                                           |
|-------------------------|---------------------------------------------------------------------------------------------------------------------------------------------------------------------------------------------------------------------------------------------------------|-----|-----------------------------------------------------------|
| Anti-RAD51 Ab           | Polyclonal rabbit antibody for detection of RAD51<br>0.25 mg/mL solution in 0.1 M Tris-glycine (pH 7.4) containing 0.15 M NaCl and 0.05% sodium azide.<br>Dilution, 1 : 2.                                                                              | 125 | 1 : 0.05 ng<br>2 : 0.10 ng<br>5 : 0.25 ng<br>10 : 0.50 ng |
| Anti-phosphotyrosine Ab | High-affinity monoclonal mouse antibody for detection of the phosphorylated forms of the peptides<br>1.5 mg/mL solution in 10 mM sodium HEPES (pH 7.5) containing 150 mM NaCl, 100 µg/mL BSA, 50% glycerol, and 0.02% sodium azide.<br>Dilution, 1 : 4. | 375 | 1 : 0.15 ng<br>2 : 0.30 ng<br>5 : 0.75 ng<br>10 : 1.50 ng |
| Anti-His tag Ab         | Anti-polyhistidine monoclonal antibody produced in mice<br>1 mg/mL immunoglobulin G2A in ascites fluid containing 15 mM sodium azide.<br>Dilution, 1 : 4.                                                                                               | 250 | 1 : 0.10 ng<br>2 : 0.20 ng<br>5 : 0.50 ng<br>10 : 1.00 ng |
| Anti-pY315 Ab           | Rabbit anti-pY315 antibody<br>0.02 mg/mL in Tris (pH 7.5) containing 0.02% sodium azide.<br>Dilution, 1 : 4.                                                                                                                                            | 5   | 2 : 0.004 ng<br>5 : 0.010 ng<br>10 : 0.020 ng             |

**Table S2.** Antibody analytes used in the protein assay by means of a label-free photonic crystal mode imaging chip.

| Antibody analyte                               | Concentration of antibody in analyte solution, µg/mL |
|------------------------------------------------|------------------------------------------------------|
| Anti-phosphotyrosine monoclonal mouse antibody | 7.5                                                  |
| Anti-His tag monoclonal mouse antibody         | 20.0                                                 |
| Anti-rabbit polyclonal antibody                | 50.0                                                 |

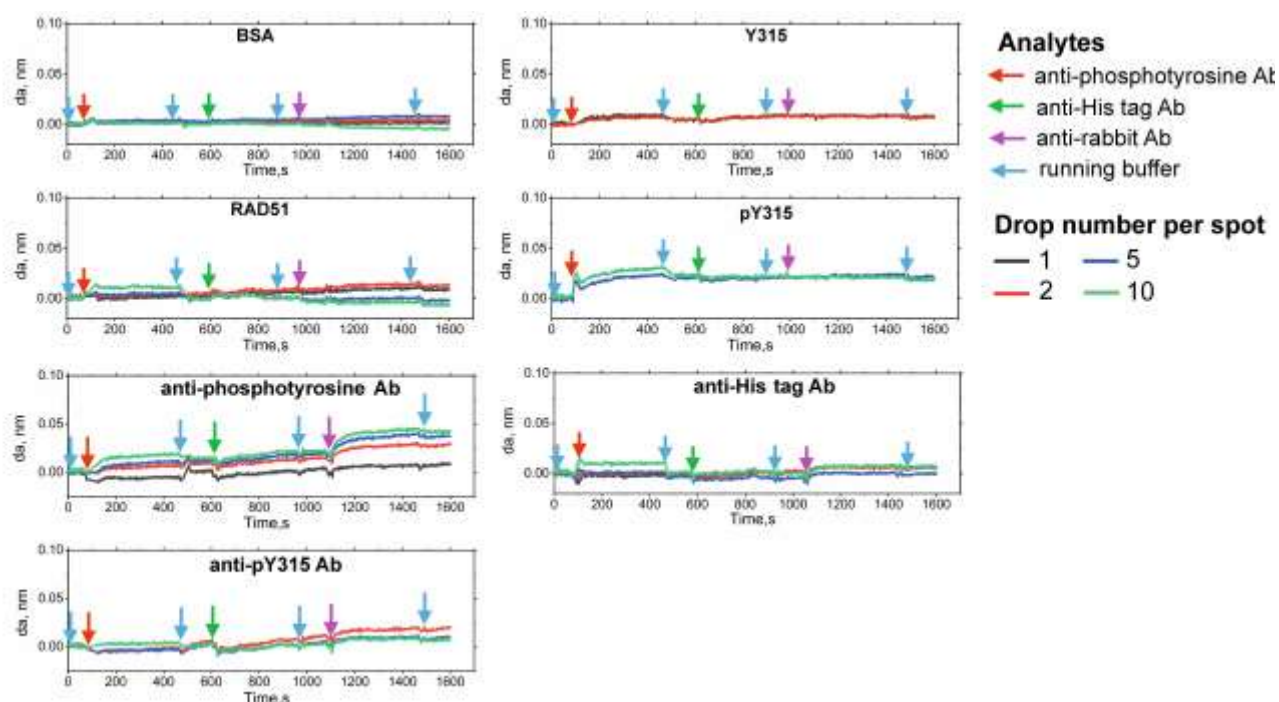

**Figure S1.** The sensorgrams of protein interactions. The start of the injection of each analyte run through the microfluidic cell is indicated with an arrow. The changes in adlayer thickness over BSA spots with time were considered to reflect the impact of nonspecific binding of the antibody analytes to chip surface preliminarily blocked with BSA. The resultant sensorgrams are presented as an average of 2 sensorgrams recorded for spot duplicate. Abbreviations: da, adlayer thickness; Ab, antibody; Y315, Y315 peptide; phospho-Y315, phospho-Y315 peptide; RAD51, DNA repair protein; BSA, bovine serum albumin; anti-phosphotyrosine Ab, antibody for detection of phosphorylated proteins; anti-phospho-Y315 Ab, antibody for detection of phospho-Y315 peptide; anti-His tag Ab, anti-polyhistidine antibody.

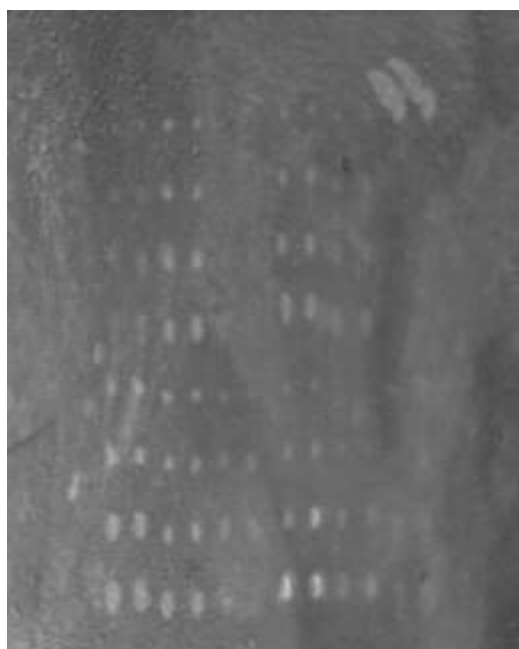

**Figure S2.** Black-and-white 2D image of the chip surface after antibody analyte running.

**Table S3.** Maximum gain of adlayer thickness over the protein/peptide spots after running of all antibody analytes.

| Protein or peptide spotted  | Mean value of the maximum gain of adlayer thickness in spots with different protein/peptide quantities |                     |                    |                    |
|-----------------------------|--------------------------------------------------------------------------------------------------------|---------------------|--------------------|--------------------|
|                             | 1 drop/spot                                                                                            | 2 drops/spot        | 5 drops/spot       | 10 drops/spot      |
| Ab-IRD800*                  | 0.04314 ± 0.00414                                                                                      | 0.06082 ± 0.00623   | 0.07969 ± 0.00843  | 0.11701 ± 0.00054  |
| Ab-AF680*                   | 0.17082 ± 0.01716                                                                                      | 0.17600 ± 0.01940   | 0.20216 ± 0.02016  | 0.26474 ± 0.01353  |
| Protein G*                  | 0.08697 ± 0.01632                                                                                      | 0.09692 ± 0.01418   | 0.11945 ± 0.01632  | 0.12391 ± 0.01988  |
| Protein A*                  | 0.06613 ± 0.00116                                                                                      | 0.06843 ± 0.00001   | 0.08414 ± 0.00004  | 0.19865 ± 0.01874  |
| Y315*                       | 0.00981 ± 0.00185                                                                                      | 0.0086 ± 0.00503    | NA                 | NA                 |
| pY315*                      | NA                                                                                                     | NA                  | 0.02105 ± 0.00554  | 0.01912 ± 0.00997  |
| RAD51*                      | 0.00988 ± 0.00481                                                                                      | 0.01278 ± 0.00001   | -0.00208 ± 0.00357 | -0.00727 ± 0.00349 |
| phosphotyrosine BSA*        | 0.01405 ± 0.00121                                                                                      | 0.05824 ± 0.00371   | 0.12785 ± 0.01209  | 0.15011 ± 0.01209  |
| BSA (reference)             | 0.00197 ± 0.00151                                                                                      | 0.00448 ± 0.00634   | 0.00821 ± 0.00646  | -0.00436 ± 0.00617 |
| anti-phosphotyrosine BSA Ab | 0.00784 ± 0.00001                                                                                      | 0.02914 ± 0.00380   | 0.03857 ± 0.00888  | 0.04313 ± 0.01686  |
| anti-RAD51 Ab               | -0.00010 ± 0.00001**                                                                                   | 0.01332 ± 0.01034** | 0.02058 ± 0.0082** | 0.09367 ± 0.01734  |
| anti-pY315 Ab               | NA                                                                                                     | 0.02045 ± 0.00371   | 0.00971 ± 0.01095  | 0.00801 ± 0.01357  |
| anti-His tag Ab             | 0.00629 ± 0.01507                                                                                      | 0.00359 ± 0.00158   | -0.00176 ± 0.00172 | 0.00560 ± 0.00452  |

\* Significant differences between the mean values of the maximum adlayer thickness in protein/peptide spots compared to the reference BSA spots ( $p < 0.05$ , Student's  $t$  test). \*\*Nonsignificant differences between the mean values of the maximum adlayer thickness in anti-RAD51 Ab and BSA spots ( $p > 0.05$ , Student's  $t$  test).
